# Supplementary material for: Preparation of a magnetic responsive immobilized lipase–cellulose microgel catalyst system: role of the surface properties of the magnetic cellulose microgel
Source: Royal Society of Chemistry journal article supplement (doi:10.1039/c5ra24984h), 2016-01-01
Supplement: c5ra24984h1.pdf [file c5ra24984h1.pdf]

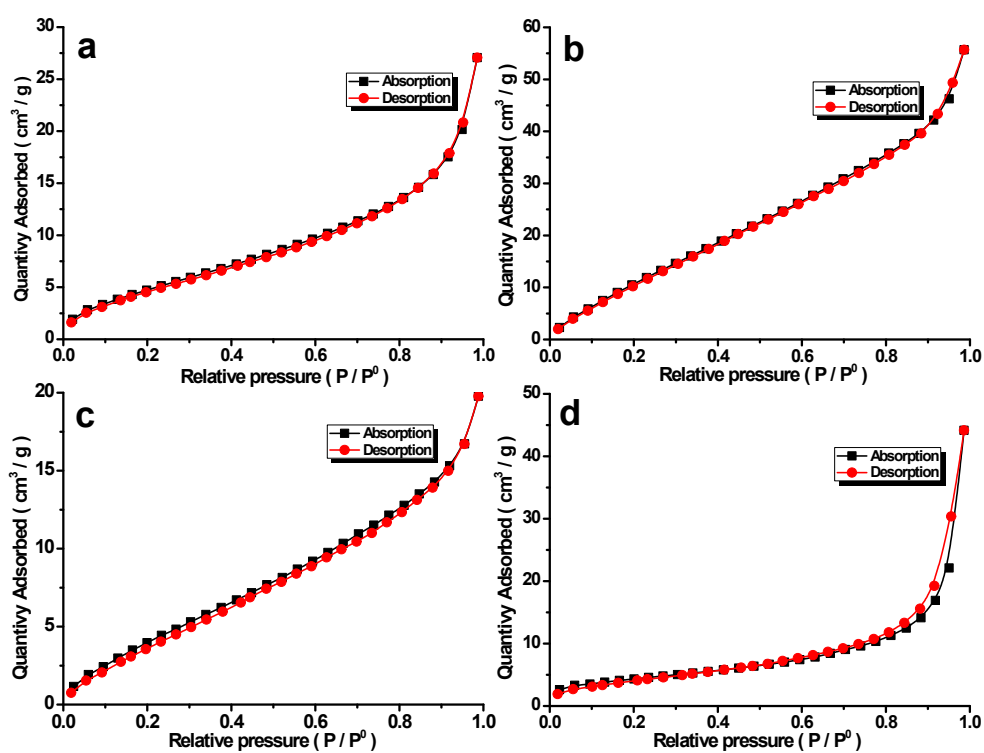

**Fig. S1** Nitrogen adsorption-desorption isotherm of magnetic regenerated cellulose microspheres, a, b, c, d were MRCM-1, MRCM-2, MRCM-3 and MRCM-4, respectively.

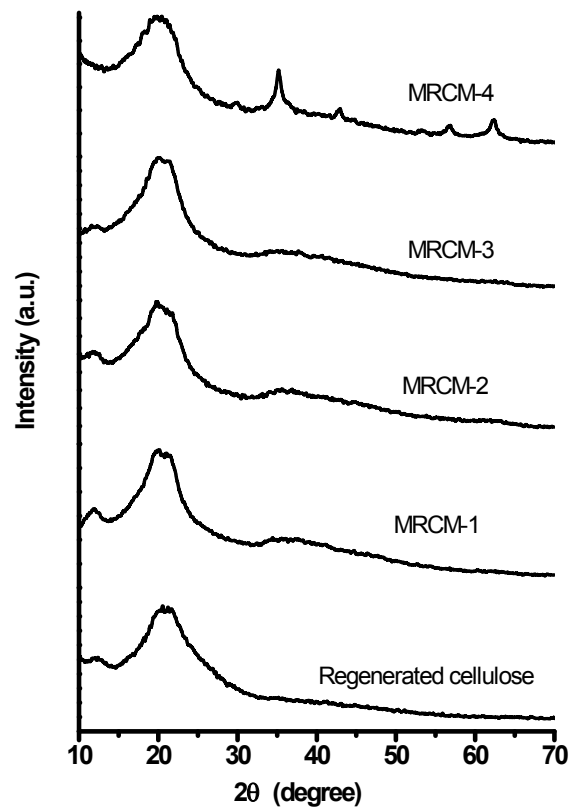

**Fig. S2** XRD of cellulose and magnetic cellulose composites.

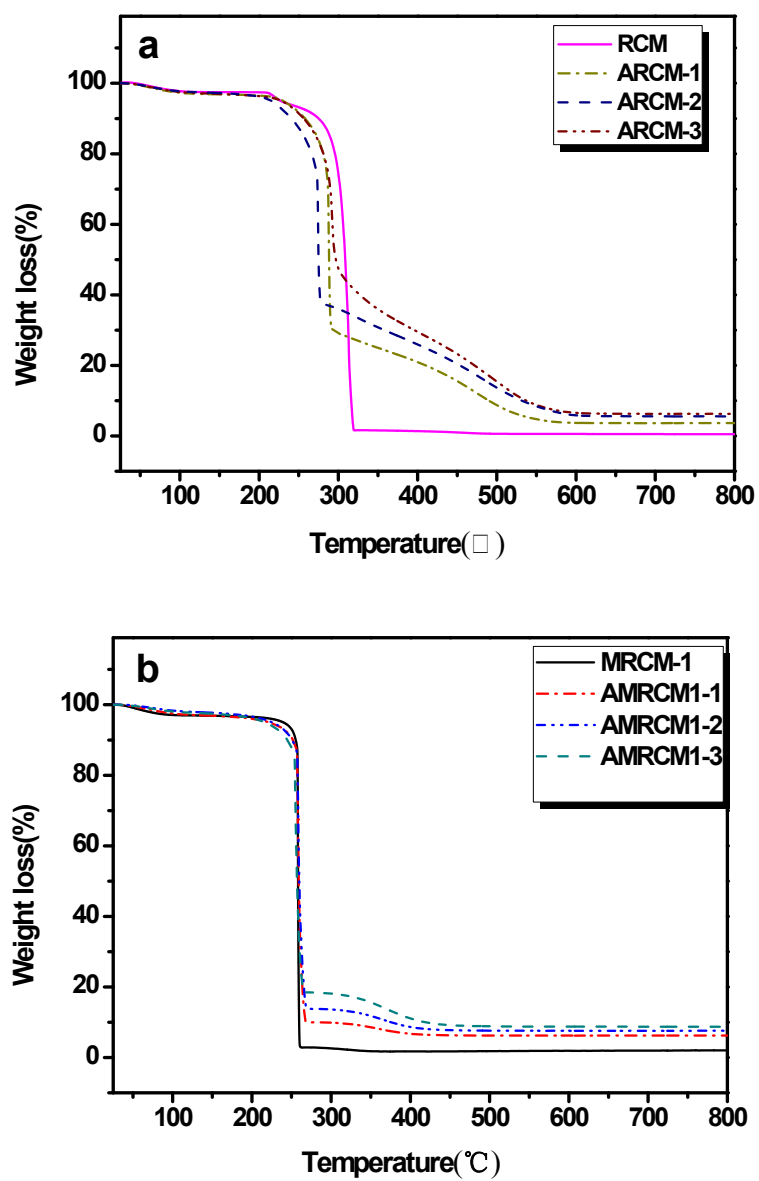

**Fig. S3** Thermal analysis of the RCM and the RCMs treated with AEAPS (a), the MRCM-1 and the MRCM-1 treated with AEAPS (b).

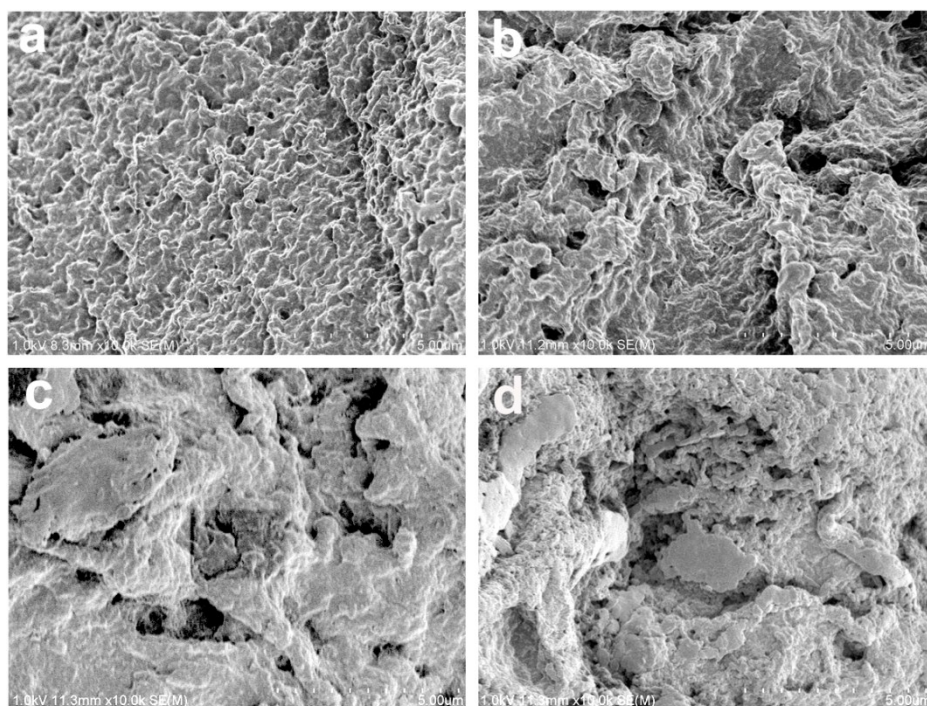

**Fig. S4** SEM images of regenerated cellulose microspheres and magnetic regenerated cellulose microspheres treated with different concentration of AEAPS: (a) ARCM-2, (b) ARCM-3, (c) AMRCM1-2 and (d) AMRCM1-3.
